# Supplementary material for: Genome wide analysis of the transition to pathogenic lifestyles in Magnaporthales fungi
Source: PubMed Central journal article supplement (PMC5897359; doi:10.1038/s41598-018-24301-6), 2018-04-12
Supplement: 41598_2018_24301_MOESM1_ESM.pdf [file 41598_2018_24301_MOESM1_ESM.pdf]

# Genome wide analysis of the transition to pathogenic lifestyles in *Magnaporthales* fungi

Ning Zhang<sup>1,2\*</sup>, Guohong Cai<sup>3</sup>, Dana C. Price<sup>4</sup>, Jo Anne Crouch<sup>5</sup>, Pierre Gladieux<sup>6</sup>, Bradley Hillman<sup>1</sup>, Chang Hyun Khang<sup>7</sup>, Marc-Henri LeBrun<sup>8</sup>, Yong-Hwan Lee<sup>9</sup>, Jing Luo<sup>1</sup>, Huan Qiu<sup>10</sup>, Daniel Veltri<sup>11</sup>, Jennifer H. Wisecaver<sup>12</sup>, Jie Zhu<sup>7</sup>, Debashish Bhattacharya<sup>2,\*</sup>

<sup>1</sup>Department of Plant Biology, Rutgers University, New Brunswick, New Jersey 08901, USA

<sup>2</sup>Department of Biochemistry and Microbiology, Rutgers University, New Brunswick, New Jersey 08901, USA

<sup>3</sup>United States Department of Agriculture, Agricultural Research Service; and Department of Botany and Plant Pathology, Purdue University, West Lafayette, Indiana 47907, USA

<sup>4</sup>Department of Plant Biology, Center for Vector Biology, Rutgers University, New Brunswick, New Jersey 08901, USA

<sup>5</sup>Mycology and Nematology Genetic Diversity and Biology Laboratory, United States Department of Agriculture, Beltsville, Maryland 20705, USA

<sup>6</sup>BGPI, Univ Montpellier, INRA, CIRAD, Montpellier SupAgro, F-34398 Montpellier, France

<sup>7</sup>Department of Plant Biology, University of Georgia, Athens, GA 30602, USA

<sup>8</sup>National Institute of Agricultural Research, Avenue Lucien Brétignières, BP 01, 78850 Thiverval-Grignon, France

<sup>9</sup>Center for Fungal Genetic Resources, Plant Genomics and Breeding Institute, and Research Institute of Agriculture and Life Sciences, Seoul National University, Seoul 08826, Republic of Korea

<sup>10</sup>Department of Ecology, Evolution and Natural Resources, Rutgers University, New Brunswick, New Jersey 08901, USA

<sup>11</sup>Bioinformatics and Computational Biosciences Branch, Office of Cyber Infrastructure and Computational Biology, National Institute of Allergy and Infectious Diseases, NIH, Rockville, MD, USA

<sup>12</sup>Department of Biochemistry, Purdue University, West Lafayette, Indiana, USA

\*Corresponding authors: Ning Zhang and Debashish Bhattacharya

(e-mails: [ningz@rutgers.edu](mailto:ningz@rutgers.edu); [d.bhattacharya@rutgers.edu](mailto:d.bhattacharya@rutgers.edu))

## Supplementary information

Supplementary Information accompanies this paper at online.

### Supplementary text

Analysis of TEs in Magnaporthales.

### Supplementary figure legends

#### Supplementary figure S1.

Bacterial-derived HGTs in the Magnaporthales. (A) Phylogenetic tree of a hypothetical protein. (B) Phylogenetic tree of an antibiotic biosynthesis monooxygenase. Statistical support ( $>0.8$ ) is indicated for each branch. Magnaporthales are shown in brown text and prokaryotes in black text. The clade identity of each major Magnaporthales lineage is shown.

#### Supplementary figure S2.

(A) Comparison of the total length of transposable element (TE) hits predicted by the REPET v2.5 pipeline as a percentage of genome size across ten fungi in the Magnaporthaceae. The ten fungi are organized according to phylogenetic relatedness, with the most basal species given on the right and most derived species on the left. TEs predicted as Class I are shown in red, Class II in green, and those of unknown class in blue. The proportion of TE hits (Total %/Class I %/Class II %/Unknown %) are as follows: *Pseudohalonestria lignicola* (3.44/2.98/0.45/0.01), *Ophioceras dolichostomum* (1.95/1.34/0.59/0.02), *Magnaporthe oryzae* 70-15 (11.88/7.64/3.71/0.53), *Magnaporthe grisea* (1.45/1.13/0.32/0.00), *Magnaporthe salvinii* M69 (2.07/1.89/0.15/0.04), *Falciphora oryzae* (15.35/11.30/3.67/0.38), *Gaeumannomyces graminis* (6.88/5.67/0.95/0.27), *Magnaporthiopsis incrustans* (4.58/3.90/0.67/0.00), *Magnaporthiopsis poae* (0.64/0.49/0.13/0.03), and *Magnaporthiopsis rhizophila* (8.01/7.62/0.39/0.00).

(B) Comparison of lengths for predicted transposable elements (TEs) grouped by orders as a percentage of genome size for each of the ten Magnaporthaceae genomes. Shown are the Class I orders: LTR, LINE and DIRS, as well as, Class II orders: TIR and Helitron. The “OTHER”

category encompasses all other TEs predicted by REPET for a given genome, including those of unknown class.

### **Supplementary figure S3.**

Comparison of di-nucleotide RIP indices produced by RIPCAL for six TE superfamilies across ten Magnaportheaceae genomes. TE superfamilies based on the Wicker system (Wicker et al. 2007) are arranged in rows by class and order: DIRS (Class I, DIRS-like), I (Class I, LINE), Copia (Class I, LTR), Gypsy (Class I, LTR), Helitron (Class II, Helitron-like), and Tc1-Mariner (Class II, TIR). Evidence for RIP (indicated by \*) is supported with index values ( $\text{TpA} / \text{ApT} \geq 0.89$  (red bars) and  $(\text{CpA} + \text{TpG}) / (\text{ApC} + \text{GpT}) \leq 1.03$  (blue bars). These cutoff values are based on previous work on *Neurospora crassa*<sup>76</sup>. Entries left blank either have less than ten respective TE sequences  $\geq 80\text{bp}$  or no single sequence  $\geq 300\text{ bp}$  as described in Methods. For the results shown, all include one or more sequence over 500 bp in length.

### **Supplementary table S1.**

Raw sequence reads of five species in Magnaporthales.

### **Supplementary table S2.**

Genome assembly and annotation statistics of five species in Magnaporthales.

### **Supplementary table S3.**

CEGMA analysis to identify 248 conserved core eukaryotic genes in assembled genomes of five species in Magnaporthales.

### **Supplementary table S4.**

The 321 cases of HGT that are either supportive or inconclusive (regardless of branch support) that need further investigation.

### **Supplementary table S5.**

Ortholog groups (OGs) that show evidence of positive selection ( $\text{FDR} \leq .01$ ) in the wood, blast, and root infecting fungal clades.

### **Supplementary table S6.**

Over-represented GO terms shared between the root and blast pathogenic fungal clades that may comprise common gene families that elucidate pathogen adaptation.

### **Supplementary table S7.**

Blast2GO enrichment analyses that highlight 54, 42, and 25 over-represented “most specific” gene ontology (GO) terms in each major fungal clade, respectively.

### **Supplementary table S8.**

List of identifiers of the secretome and small secreted proteins (SSPs), and species-specific SSPs in Magnaporthales species.

### **Supplementary table S9.**

List of identifiers of the clade-specific secretome and small secreted proteins (SSPs) in Magnaporthales species.

## **Supplementary Text**

### **Transposon Analyses**

**Analysis of *de novo* TEs:** REPET *de novo* predicted TEs from the *TEdenovo* pipeline were clustered using the CD-HIT server to check for similarities across the ten genomes. 580 initial sequences were clustered into 340 clusters containing, at most, 18 sequences with  $\geq 80\%$  shared sequence identity. The majority of TE clusters (337) contain TEs from only a single Magnaporthales taxon, suggesting that most of these elements are adapted to their genome of origin, and/or originated after diversification and speciation. Eight TE clusters were identified as containing TEs from two taxa, while one example was found to contain TEs from three and four taxa, respectively (Clusters 21 and 35). BLAST2GO was run on the representative sequence identified by CD-HIT for each cluster using the NCBI *nt* database. Cluster #21, with TEs from four taxa (*G. graminis*, *M. incrustans*, *M. poae*, and *M. rhizophila*), was checked using a large retrotransposon derivative (LARD) representative sequence from *M. incrustans* and produced a consensus hit of “proline permease mRNA 13508” (NCBI: XM\_009228526.1) from the *G. graminis tritici R3-111a-1* genome. Cluster #35 with TEs from three taxa (*F. oryzae*, *M. poae*, and *M. rhizophila*) was most similar to an *F. oryzae* unclassified TIR and returned a “telomere partial sequence” result from the *M. oryzae 70-15* genome. Across all clusters, avirulence (AVR) genes from *M. oryzae* were the most common identification (33 hits), including: Pita-1 (19 hits), Pita-2 (2 hits) and Pia (12 hits). This is unsurprising given that AVR genes have been shown in

previous work to occur near TE regions in *M. oryzae* (Singh et al. 2014, Zhang et al. 2014, Chuma et al. 2011).

**RIP analysis:** Repeat families were assessed for evidence of RIP (Selker 1990; Cambareri et al. 1989) using the RIPCAL program as indicated in Fig. S3 for the DIRS, I, Copia, Gypsy, Helitron and Tc1-Mariner TE superfamilies. With the exception of *O. dolichostomum* and *M. rhizophila*, evidence for RIP was found in at least one TE superfamily: *P. lignicola* (DIRS, Helitron), *M. oryzae* (DIRS, I, Copia, Helitron, Tc1-Mariner), *M. grisea* (I, Gypsy, Tc1-Mariner), *M. salvinii* (DIRS, Gypsy), *F. oryzae* (DIRS, Helitron), *G. graminis* (Helitron), *M. incrustans* (DIRS, Helitron), and *M. poae* (Copia, Gypsy). Fig. S3 also shows the di-nucleotide RIP indices (TpA / ApT) and (CpA + TpG) / (ApC + GpT) produced by RIPCAL for the above TE superfamilies. We note cutoffs for the RIP indices used originate from work on *Neurospora crassa*, so it is possible the given taxa might be better characterized using different values.

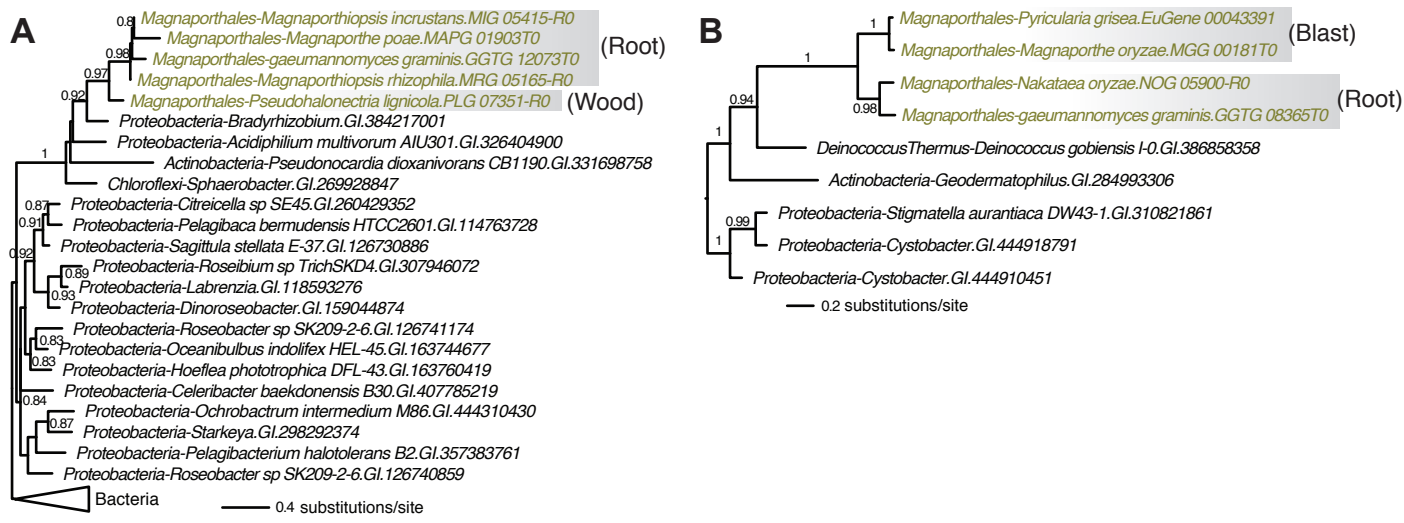

Fig. S1

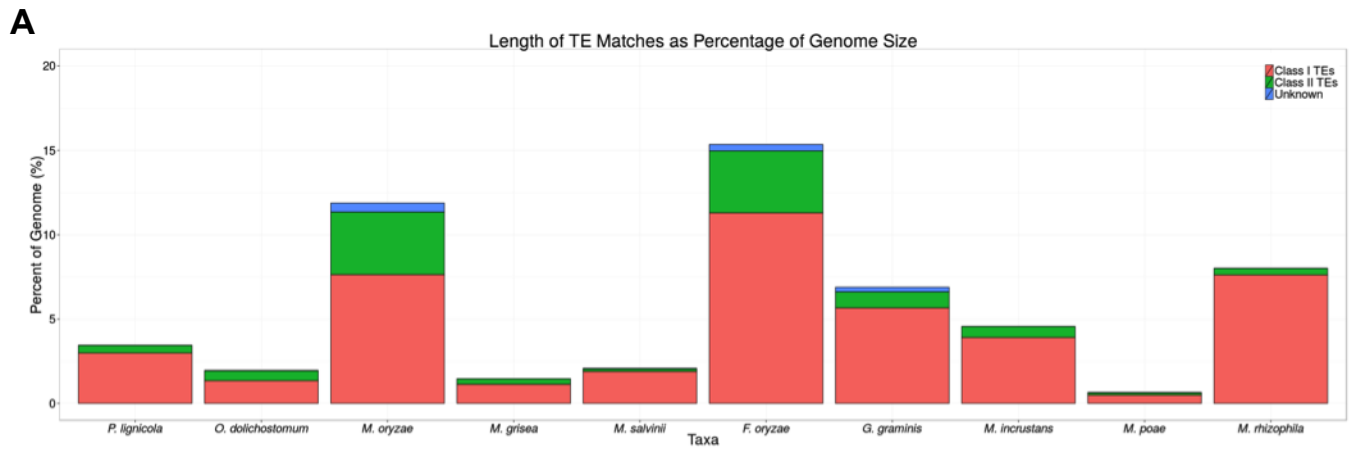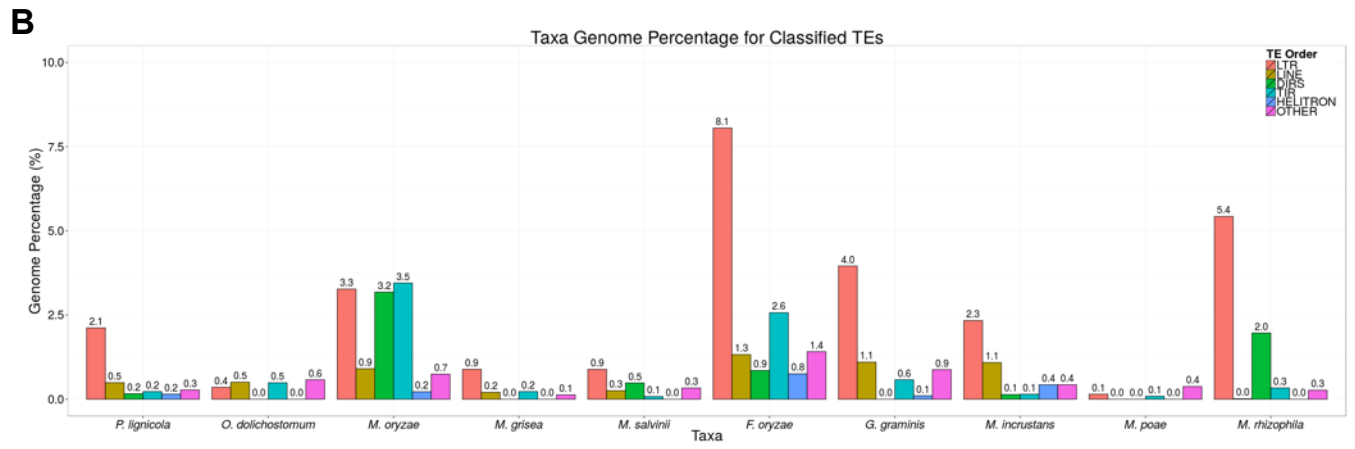

Fig. S2

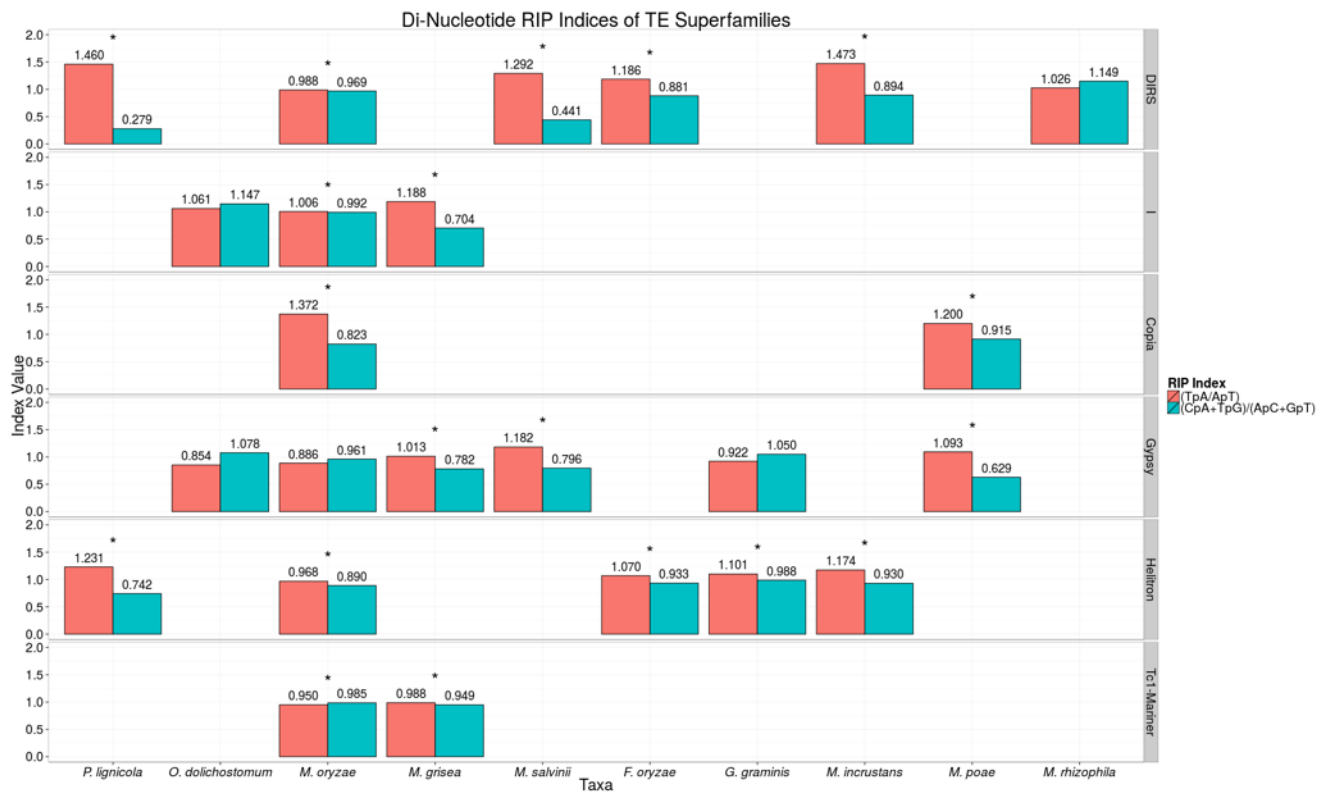

Fig. S3



**Table S1.** Raw sequence reads of five species in Magnaporthales.

| Species                            | Strain    | Genome sequences |             | Transcriptome sequences |             |
|------------------------------------|-----------|------------------|-------------|-------------------------|-------------|
|                                    |           | # read pairs     | read length | # read pairs            | read length |
| <i>Ophioceras dolichostomum</i>    | CBS114926 | 10,243,331       | 146         | 32,612,302              | 158         |
| <i>Magnaporthiopsis rhizophila</i> | M23       | 18,996,598       | 146         | 28,734,571              | 158         |
| <i>Magnaporthiopsis incrustans</i> | M35       | 25,862,061       | 146         | 18,109,452              | 158         |
| <i>Nakataea oryzae</i>             | M69       | 29,578,101       | 146         | 16,485,688              | 158         |
| <i>Pseudohalonestria lignicola</i> | M95       | 25,160,531       | 146         | 17,510,655              | 158         |

**Table S2.** Genome assembly and annotation statistics of five species in Magnaporthales.

| Species                            | Strain    | Scaffold |     | Contig   |     | Assembly Size (Mb) | GC ratio % | # gene models |
|------------------------------------|-----------|----------|-----|----------|-----|--------------------|------------|---------------|
|                                    |           | N50 (bp) | L50 | N50 (bp) | L50 |                    |            |               |
| <i>Ophioceras dolichostomum</i>    | CBS114926 | 97,088   | 137 | 47,722   | 266 | 43.0               | 56         | 12,519        |
| <i>Magnaporthiopsis rhizophila</i> | M23       | 251,881  | 52  | 57,017   | 268 | 39.9               | 54         | 12,210        |
| <i>Magnaporthiopsis incrustans</i> | M35       | 164,440  | 74  | 59,869   | 205 | 39.3               | 56         | 12,933        |
| <i>Nakataea oryzae</i>             | M69       | 61,937   | 179 | 29,850   | 344 | 34.9               | 58         | 12,077        |
| <i>Pseudohalonestria lignicola</i> | M95       | 103,568  | 122 | 29,851   | 188 | 41.6               | 54         | 12,176        |

**Table S3.** CEGMA analysis to identify 248 conserved core eukaryotic genes in assembled genomes of five species in Magnaporthales.

| Species                            | Strain    | Complete |      | Partial |      | Total % | Missing                                                                |
|------------------------------------|-----------|----------|------|---------|------|---------|------------------------------------------------------------------------|
|                                    |           | # genes  | %    | # genes | %    |         |                                                                        |
| <i>Ophioceras dolichostomum</i>    | CBS114926 | 237      | 0.96 | 6       | 0.02 | 0.98    | KOG0276, KOG1185, KOG2311, KOG3232, KOG4392                            |
| <i>Magnaporthiopsis rhizophila</i> | M23       | 235      | 0.95 | 6       | 0.02 | 0.97    | KOG0261, KOG0292, KOG0969, KOG1123, KOG1185, KOG2311, KOG3232          |
| <i>Magnaporthiopsis incrustans</i> | M35       | 235      | 0.95 | 5       | 0.02 | 0.97    | KOG0261, KOG0291, KOG0434, KOG0969, KOG1123, KOG1185, KOG2311, KOG3232 |
| <i>Nakataea oryzae</i>             | M69       | 236      | 0.95 | 5       | 0.02 | 0.97    | KOG0062, KOG0209, KOG0969, KOG1123, KOG1185, KOG2311, KOG3232          |
| <i>Pseudohalonestria lignicola</i> | M95       | 236      | 0.95 | 6       | 0.02 | 0.98    | KOG0062, KOG0434, KOG1185, KOG1466, KOG2036, KOG2311                   |
